# Supplementary material for: Promoting the hydrogenation of acetone C–C coupling into pinacol with dehydrogenation of formic acid over a NaOH-treated g-C3N4 photocatalyst
Source: Royal Society of Chemistry journal article supplement (doi:10.1039/d0nj01707h), 2020-01-01
Supplement: d0nj01707h1.pdf [file d0nj01707h1.pdf]

Supporting Information for  
Promotion of the Hydrogenation of Acetone C-C coupling into Pinacol with Dehydrogenation of  
Formic Acid Over NaOH-treated g-C<sub>3</sub>N<sub>4</sub> Photocatalyst

Baoyue Cao\*, Xiangting Wang, Liangliang Chang, Xiuyu Liu, Han Wang, Jinyi Guo,  
Chunsheng Zhou\*

Shaanxi Key Laboratory of Comprehensive Utilization of Tailings Resources, College of  
Chemical Engineering and Modern Materials, Shangluo University, Shangluo 726000, China.

\*Correspondence to: cby0406@163.com; happy6666cc@126.com

**This supporting information contains:**

Experimental details

Figures S1-S2

**Figures S1-S2**

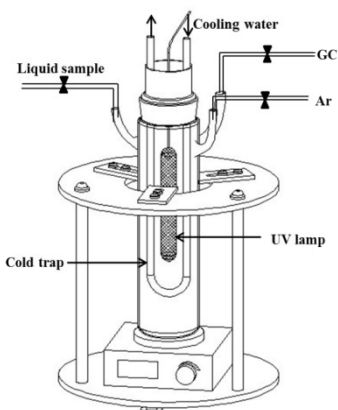

**Figure S1.** A schematic of the employed photocatalysis reactor.

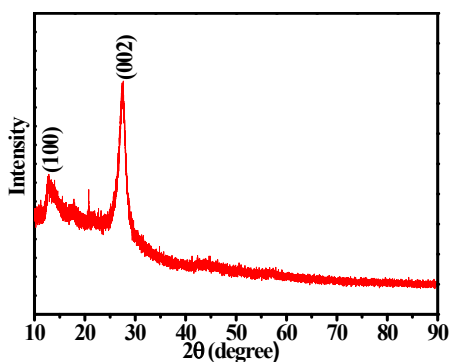

Figure S2 XRD pattern of g-C<sub>3</sub>N<sub>4</sub> photocatalyst

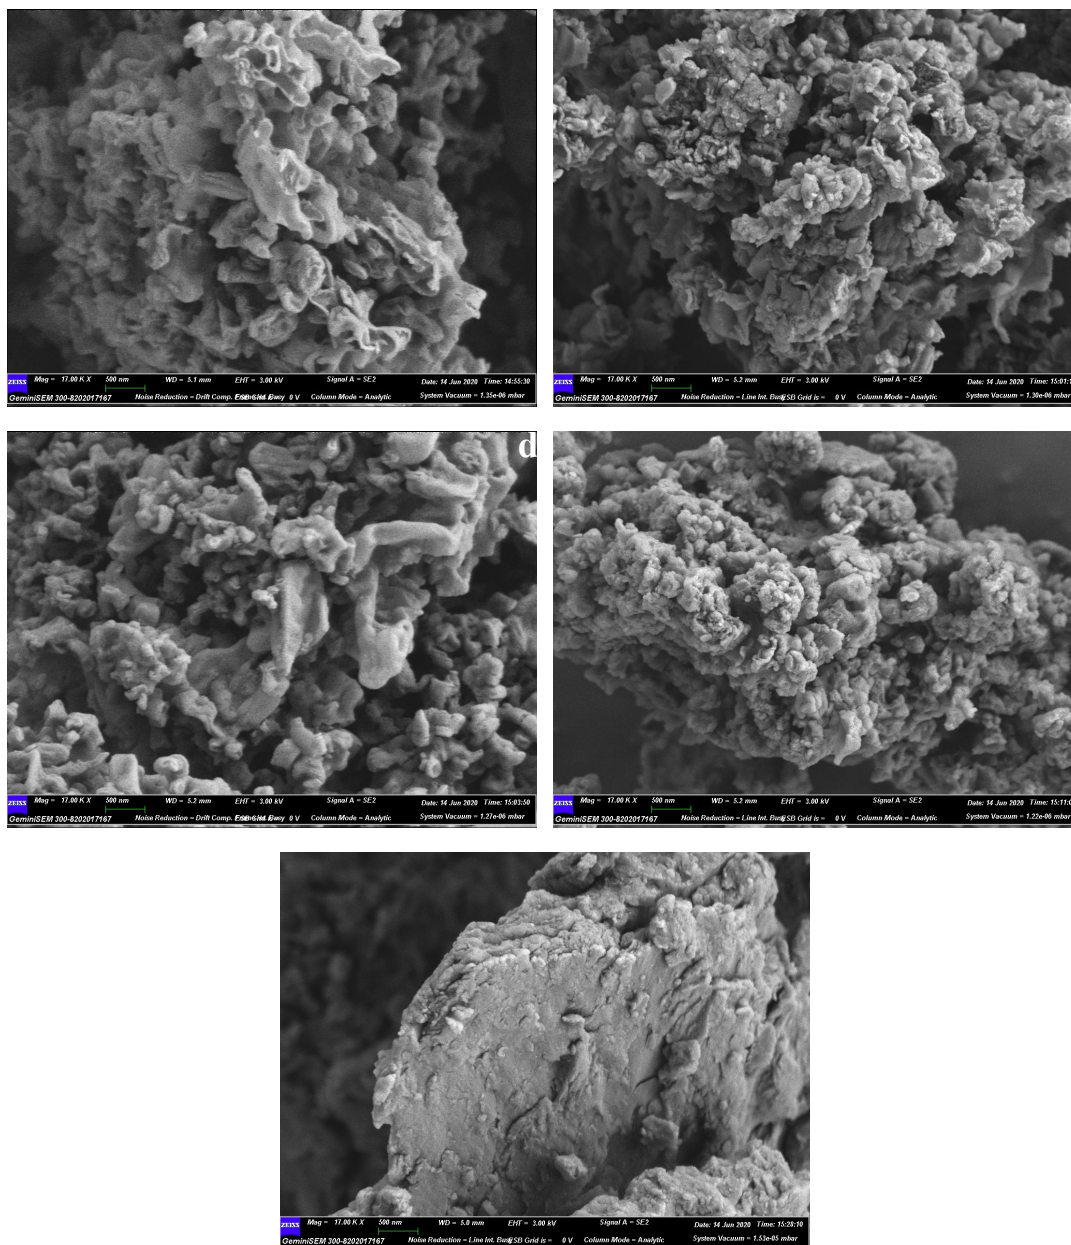

Figure S3 SEM images of (a) g-C<sub>3</sub>N<sub>4</sub> photocatalyst, (b) 0.5M NaOH treated g-C<sub>3</sub>N<sub>4</sub> photocatalyst, (c) 1 M NaOH treated g-C<sub>3</sub>N<sub>4</sub> photocatalyst, (d) 5 M NaOH treated g-C<sub>3</sub>N<sub>4</sub> photocatalyst, (e) 10 M NaOH treated g-C<sub>3</sub>N<sub>4</sub> photocatalyst.

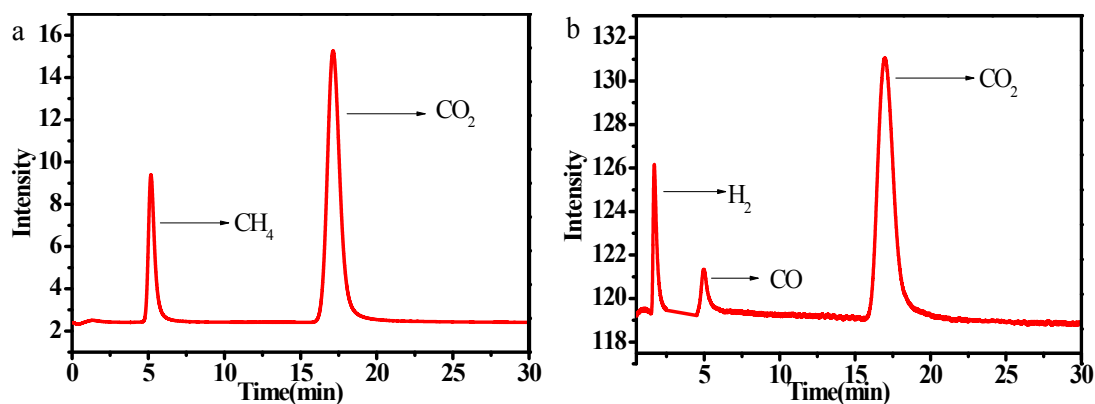

Figure S4 The Gas Chromatography-Mass Spectrometer(GCMS) data of photocatalytic products of FA

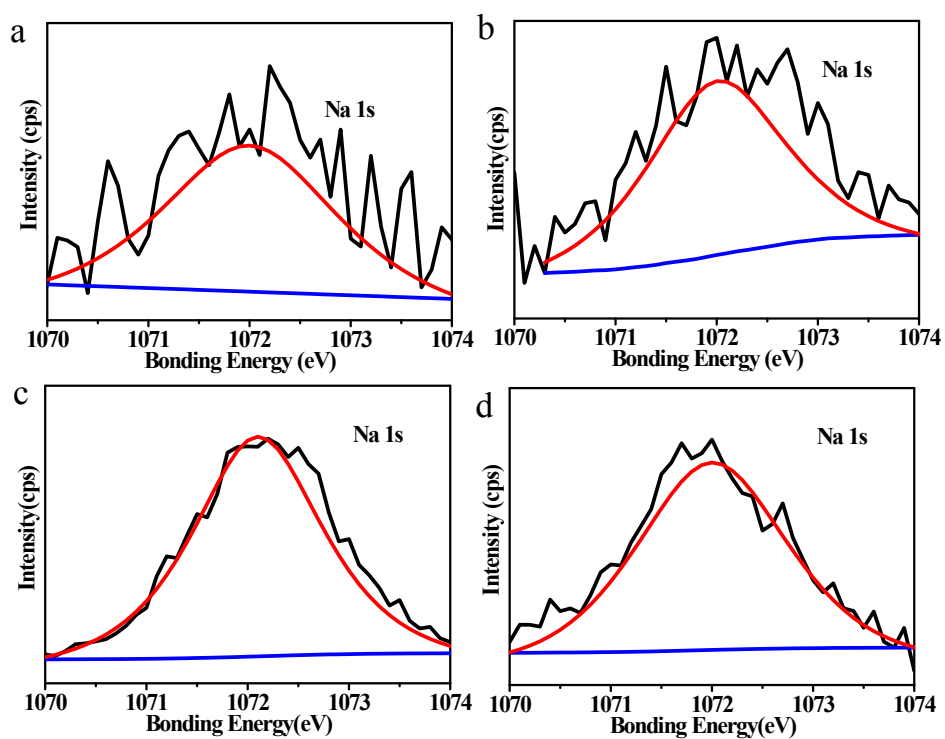

Figure S5 a, b, c and d were the Na 1s spectrum of the 0.5M、1M、5M、10M NaOH treated g- $\text{C}_3\text{N}_4$ , and the surface content of the  $\text{Na}^+$  was 0.24 %, 0.42 %, 1.43 %, 0.95 %, respectively.

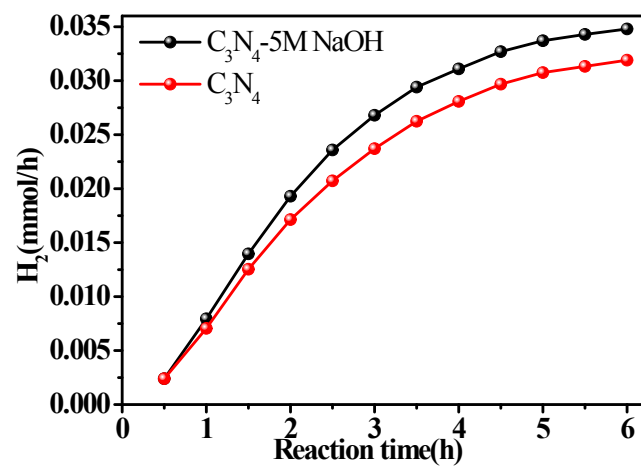

Figure S6. The H<sub>2</sub> generation amount from FA
